# Supplementary material for: Lipase Catalysed Kinetic Resolution of Racemic 1,2-Diols Containing a Chiral Quaternary Center
Source: MDPI journal article supplement (doi:10.3390/molecules23071585), 2018-06-29
Supplement: s1 [file s1]

# Lipase catalyzed kinetic resolution of racemic 1,2-diols containing a chiral quaternary center

Gonzalo de Gonzalo

## Supporting Information

### Contents:

1. HPLC analyses.....S2
2. NMR signals of the known compounds.....S2

## 1. HPLC Analyses

For the determination of the enantiomeric excesses of compounds (*R*)-**1-6c** and (*S*)-**1-6d** (Table S1), the following columns were employed: column A: Chiralcel OD (0.46 cm x 25 cm) and column B: Chiralpak AD-H (0.46 cm x 25 cm), both from Daicel. The optical purity of the chiral 1,2-diols **1-6c** is determined after acetylation to the acetates **1-6d**.

**Table S1.** Determination of enantiomeric excesses of acetates **1-6d** by HPLC.

| Compounds | Column | Flow rate<br>(mL min <sup>-1</sup> ) | T (°C) | Eluent <sup>a</sup>       | Retention time [min]                 |
|-----------|--------|--------------------------------------|--------|---------------------------|--------------------------------------|
| <b>1d</b> | A      | 1.0                                  | 30     | <i>n</i> -hexane-IPA 99:1 | 15.3 ( <i>R</i> ); 19.0 ( <i>S</i> ) |
| <b>2d</b> | A      | 1.0                                  | 30     | <i>n</i> -hexane-IPA 99:1 | 13.9 ( <i>R</i> ); 17.2 ( <i>S</i> ) |
| <b>3d</b> | B      | 1.0                                  | 30     | <i>n</i> -hexane-IPA 95:5 | 19.5 ( <i>S</i> ); 30.1 ( <i>R</i> ) |
| <b>4d</b> | B      | 1.0                                  | 30     | <i>n</i> -hexane-IPA 95:5 | 14.9 ( <i>S</i> ); 20.0 ( <i>R</i> ) |
| <b>5d</b> | B      | 1.0                                  | 30     | <i>n</i> -hexane-IPA 95:5 | 11.2 ( <i>S</i> ); 16.8 ( <i>R</i> ) |
| <b>6d</b> | A      | 1.0                                  | 30     | <i>n</i> -hexane-IPA 99:1 | 19.0 ( <i>R</i> ); 21.1 ( <i>S</i> ) |

<sup>a</sup> All the experiments were performed with isocratic eluent.

## 2. NMR Signals of the known compounds

(±)-Ethyl 2,3-dihydroxy-2-phenylpropanoate, (±)-**1d**: <sup>1</sup>H-RMN (300 MHz, CDCl<sub>3</sub>): δ (ppm) 7.60 (d, 2H, *J* = 8.2 Hz), 7.39-7.30 (m, 3H), 4.37-4.25 (m, 3H), 4.13 (bs, 1H, OH), 3.75 (d, 1H, *J* = 11.2 Hz), 2.56 (bs, 1H, OH), 1.31 (t, 3H, *J* = 7.1 Hz). <sup>13</sup>C-RMN (75.4 MHz, CDCl<sub>3</sub>): δ (ppm) 173.6 (C=O), 138.1 (C<sub>Ar</sub>), 128.3 (2CH<sub>Ar</sub>), 128.2 (2CH<sub>Ar</sub>), 125.3 (CH<sub>Ar</sub>), 79.4 (C), 68.2 (CH<sub>2</sub>), 62.8 (CH<sub>2</sub>), 13.9 (CH<sub>3</sub>).

(±)-Ethyl 2,3-dihydroxy-2-(4-methoxyphenyl)propanoate, (±)-**4d**: <sup>1</sup>H-RMN (300 MHz, CDCl<sub>3</sub>): δ (ppm) 7.50 (d, 2H, *J* = 8.5 Hz), 6.89 (d, 2H, *J* = 8.5 Hz), 4.34-4.25 (m, 2H), 4.21 (d, 1H, *J* = 11.2 Hz), 4.10 (bs, 1H, OH), 3.80 (s, 3H), 3.72 (d, 1H, *J* = 11.2 Hz), 2.57 (bs, 1H, OH), 1.30 (t, 3H, *J* = 7.0 Hz). <sup>13</sup>C-RMN (75.4 MHz, CDCl<sub>3</sub>): δ (ppm) 173.8 (C=O), 159.4 (C<sub>Ar</sub>), 130.2 (C<sub>Ar</sub>), 126.4 (2CH<sub>Ar</sub>), 113.7 (2CH<sub>Ar</sub>), 79.1 (C), 68.2 (CH<sub>2</sub>), 62.7 (CH<sub>2</sub>), 55.2 (CH<sub>3</sub>), 14.0 (CH<sub>3</sub>).

(±)-Ethyl 2,3-dihydroxy-2-(thiophen-1-yl)propanoate, (±)-**5c**: <sup>1</sup>H-RMN (300 MHz, CDCl<sub>3</sub>): δ (ppm) 7.25 (dd, 1H, *J* = 5.4, 1.7 Hz), 7.10 (dd, 1H, *J* = 3.4, 1.7 Hz), 6.98 (dd, 1H, *J* = 5.4, 3.4 Hz), 4.37-4.26 (m, 3H), 4.13 (d, 1H, *J* = 11.5 Hz), 3.80 (d, 1H, *J* = 11.5 Hz), 2.34 (bs, 1H, OH), 1.33 (t, 3H, *J* = 7.0 Hz). <sup>13</sup>C-RMN (125 MHz, CDCl<sub>3</sub>): δ (ppm) 172.7 (C=O), 142.2 (C<sub>Ar</sub>), 127.1 (CH<sub>Ar</sub>), 125.4 (CH<sub>Ar</sub>), 124.4 (CH<sub>Ar</sub>), 78.3 (C), 69.0 (CH<sub>2</sub>), 63.2 (CH<sub>2</sub>), 13.9 (CH<sub>3</sub>).
